# Supplementary material for: Modeling Hybridization Kinetics of Gene Probes in a DNA Biochip Using FEMLAB
Source: Microarrays (Basel). 2017 May 29;6(2):9. doi: 10.3390/microarrays6020009 (PMC5487956; doi:10.3390/microarrays6020009)
Supplement: Supplementary file 1 [file microarrays-06-00009-s001.xlsx]

## Sheet: Re-Pe
Calculation of Reynold's Number (Re) and Péclet Number (Pe) at various Recirculation Fowrates inside the Chip
	Note: Velocity is computed for one representative channel with single microreactor
	Re indicates that Re<<1 that's its creeping flow or stokes flow that can be resolved using
	laminar conditions
	Hydraulic Diameter is defined as:
	Where A is the cross-sectional area and P is the wetted perimeter.
	Channel Width	14	um=	1.4e-05	m		ρ =	1000	kg/m3
	Channel Height	15	um=	1.5e-05	m		μ=	0.001	kg/m.s
	Area (A)			2.1e-10	m2		ν=	1e-06	m2/s
	Perimeter (P)			5.8e-05	m
	Dh			1.44828e-05	m
	For flow in a pipe or tube, the Reynolds number is defined as:
	Flowrate(ml/min)	0.01	0.1	0.25	0.5	1	1.5	2	3	4	6	10	20
	Velocity(m/s)	6.02816e-06	6.02816e-05	0.000150704	0.000301408	0.000602816	0.000904225	0.00120563	0.00180845	0.00241127	0.0036169	0.00602816	0.0120563
	Re	8.73044e-05	0.000873044	0.00218261	0.00436522	0.00873044	0.0130957	0.0174609	0.0261913	0.0349218	0.0523827	0.0873044	0.174609
	The Peclet number is defined as:
	For mass transfer, it is defined as:
	The figure on the right is Figure 4 in the manuscript illustrating the Influence of flow rate on the hybridization kinetics of vancomycin resistance genes
	It is reproduced here to show that Re was less than 1 even at the very high flowrate of 20 ml/min
	Insert: Signal intensity and flow rate at 14 hr hybridization.
	Diffusion Coefficient from Chan, V.; Graves, D. J.; McKenzie, S. E. The biophysics of DNA hybridization with immobilized oligonucleotide probes. Biophys J 1995, 69, 2243–2255.
	Base Pair	D (1e-12 m2/s)
	6	188
	30	90
	160	6.91
	2686	3.8
	4373	2.7
	5996	2.2
	10600	1.69
	21692	1.1
	40461	0.9
	D[estimated]	75.0698	7.50698e-11	m2/s
	Flowrate(ml/min)	0.01	0.1	0.25	0.5	1	1.5	2	3	4	6	10	20
	Velocity(m/s)	6.02816e-06	6.02816e-05	0.000150704	0.000301408	0.000602816	0.000904225	0.00120563	0.00180845	0.00241127	0.0036169	0.00602816	0.0120563
	Re	8.73044e-05	0.000873044	0.00218261	0.00436522	0.00873044	0.0130957	0.0174609	0.0261913	0.0349218	0.0523827	0.0873044	0.174609
	Pe	1.16298	11.6298	29.0744	58.1488	116.298	174.447	232.595	348.893	465.191	697.786	1162.98	2325.95
	When the Péclet number is greater than one, the effects of convection exceed those of diffusion in determining the overall mass flux.
